# Supplementary material for: Potential Biomedical Applications of Collagen Filaments derived from the Marine Demosponges Ircinia oros (Schmidt, 1864) and Sarcotragus foetidus (Schmidt, 1862)
Source: MDPI journal article supplement (doi:10.3390/md19100563), 2021-10-06
Supplement: s1 [file s1]

## Supplementary materials

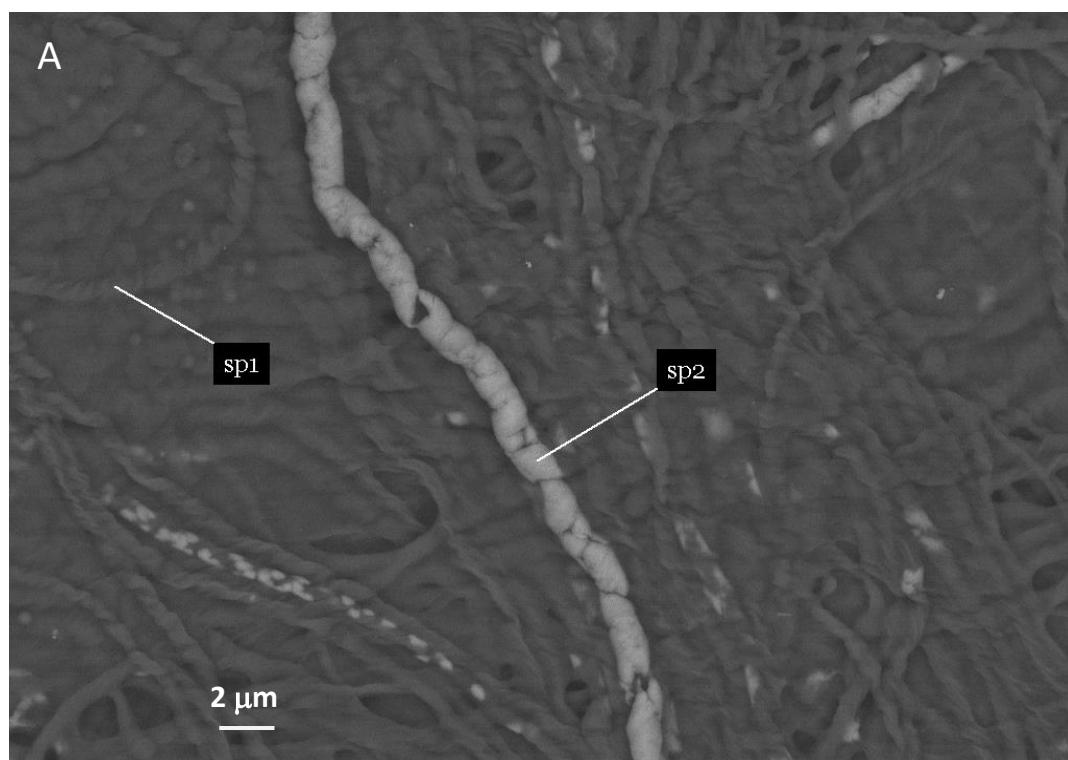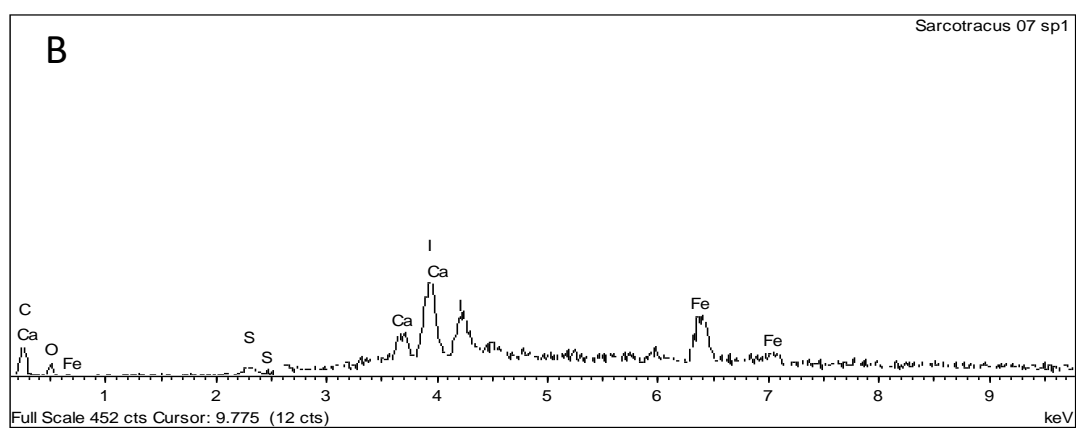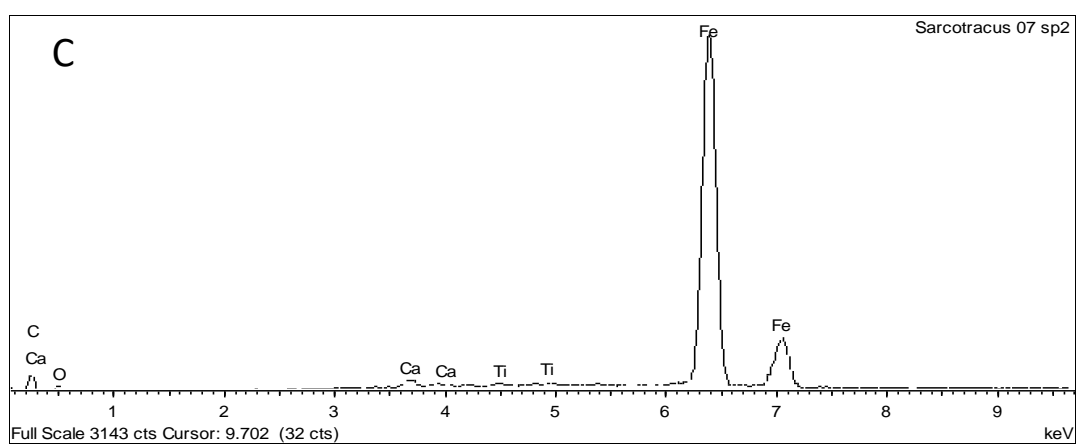

**Figure S1** EDS spectra of *S. foetidus* filaments. Electronic microscopy images (A). EDS spectra sp1 (B). EDS spectra sp2 (C).

**Figure S2**

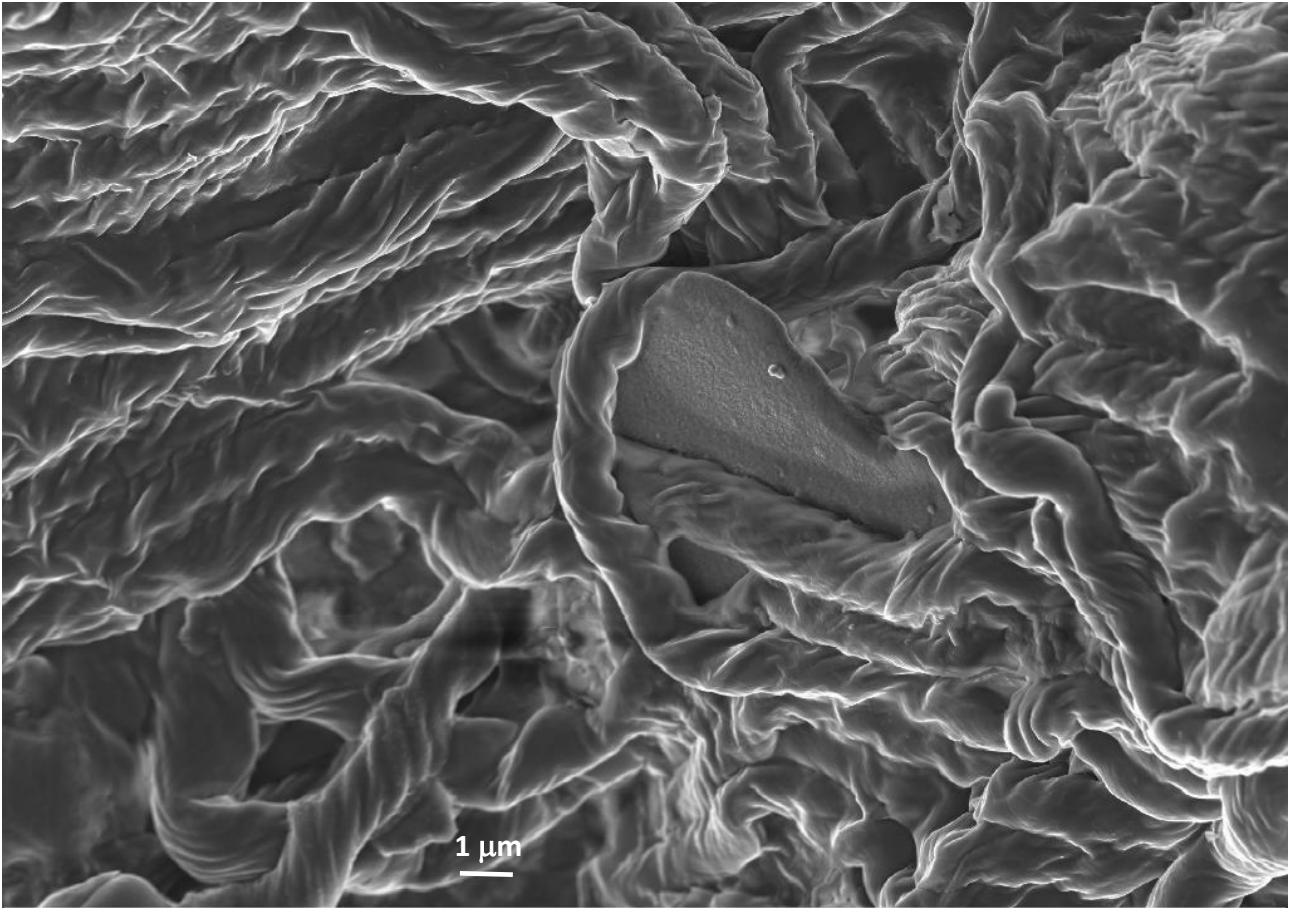

**Figure S2.** *S. foetidus* collagen filament in native tissue.

**Table S1** Primer sequences used in the qPCR analyses.

| Gene  | GeneBank id  | Forward                         | Reverse                        |
|-------|--------------|---------------------------------|--------------------------------|
| GAPDH | M32599       | 5'-TCTCCCTCACAAATTTCCATCCCAG-3' | 5'-GGGTGCAGCGAACTTTATTGATGG-3' |
| Col1A | NM_007742.4  | 5'-CTGCTGGTCCTGCTGGTC-3'        | 5'-CCTTGTTGCGCTGTCTCAC-3'      |
| Fn1   | NM_001276412 | 5'-CCAGTTCAGAGGAGCATCAG-3'      | 5'-GGCATTGTCGTTTCAGAGTGTA-3'   |
